# Supplementary material for: Facile synthesis of two-dimensional highly branched gold nanostructures in aqueous solutions of cationic gemini surfactant
Source: Royal Society of Chemistry journal article supplement (doi:10.1039/c3ce26527g), 2013-01-01
Supplement: c3ce26527g.pdf [file c3ce26527g.pdf]

## **Electronic Supplementary Information**

### **Facile synthesis of two-dimensional highly branched gold nanostructures in aqueous solutions of cationic gemini surfactant**

Wentao Wang, Yuchun Han, Mingyuan Gao\* and Yilin Wang\*

Key Laboratory of Colloid and Interface Science, Beijing National Laboratory for Molecular Sciences (BNLMS), Institute of Chemistry, Chinese Academy of Sciences, Beijing 100190, People's Republic of China

\*To whom the correspondence should be addressed. E-mail: [yilinwang@iccas.ac.cn](mailto:yilinwang@iccas.ac.cn);  
[gaomy@iccas.ac.cn](mailto:gaomy@iccas.ac.cn).

Tel: 86-10-82615802

Fax: 86-10-82615802

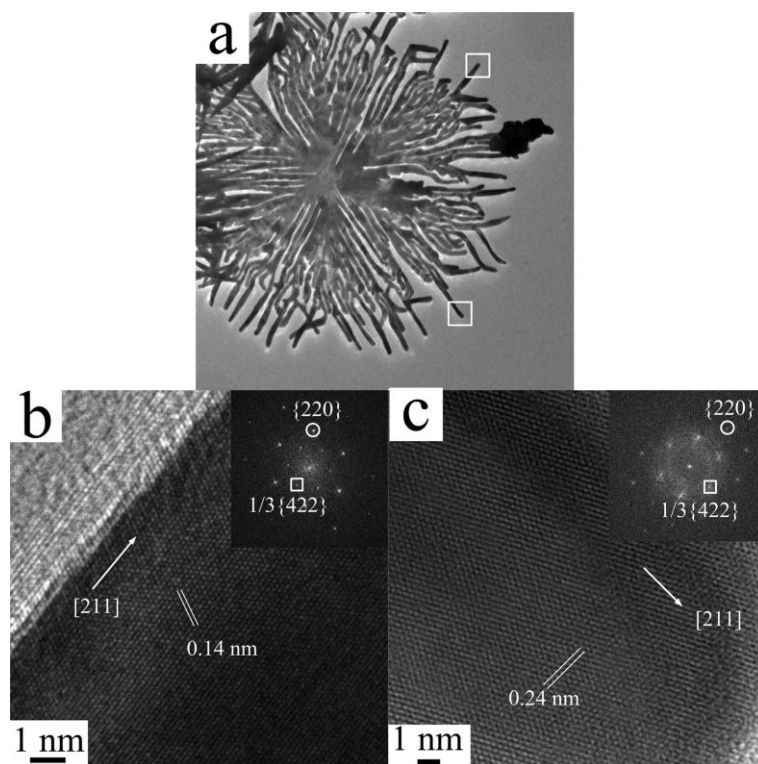

**Fig. S1** TEM image of a representative 2DHBN (a), and HRTEM images (b, c) of the tips as marked by white squares in panel a. The insets are the corresponding FFT patterns.

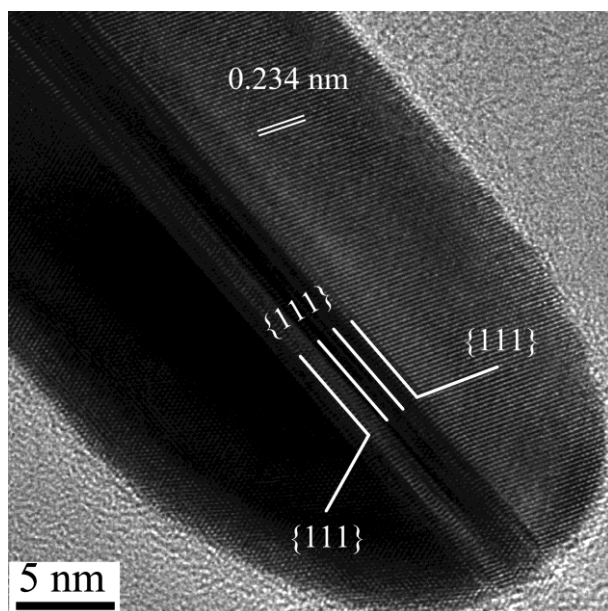

**Fig. S2** HRTEM images of the tip of a single arm perpendicular to TEM grid.

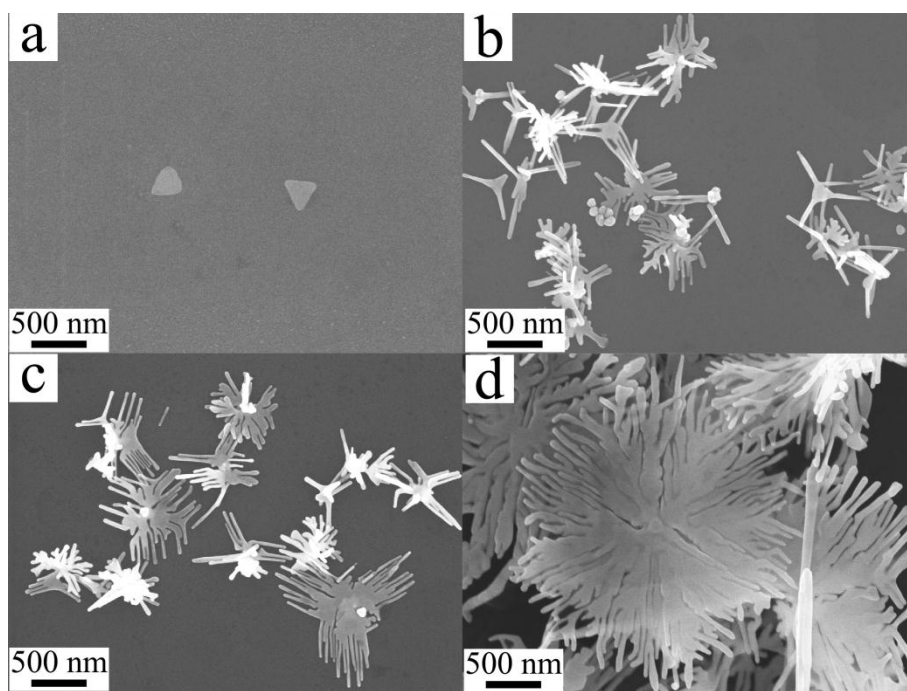

**Fig. S3** SEM images of gold products obtained after reaction for 2 min (a), 5 min (b), 10 min (c) and 30 min (d).  $[\text{C}_{12}\text{C}_6\text{C}_{12}\text{Br}_2] = 0.1 \text{ mM}$ ,  $[\text{HAuCl}_4] = 0.2 \text{ mM}$ ,  $[\text{AA}] = 0.2 \text{ mM}$ ,  $25 \text{ }^\circ\text{C}$ .

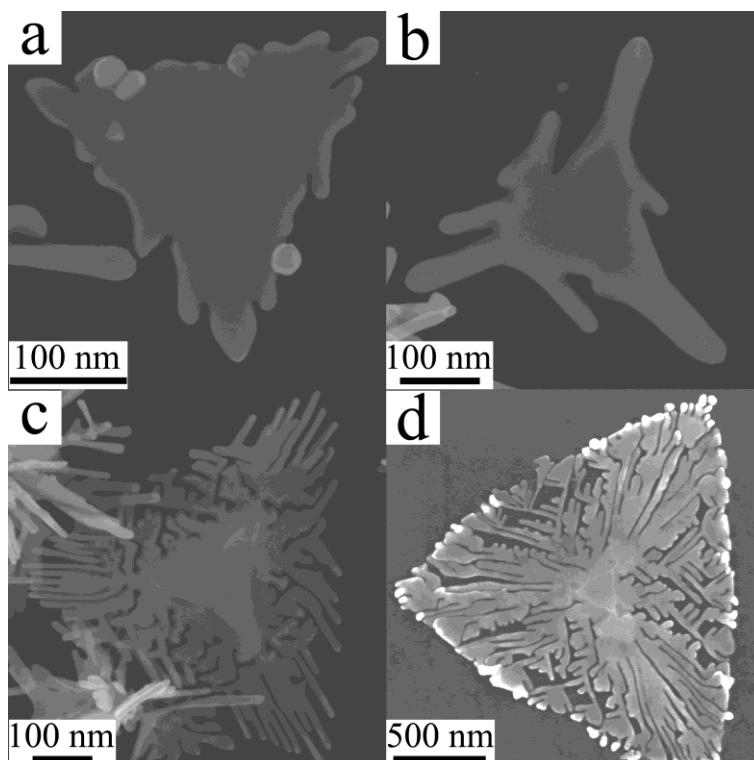

**Fig. S4** SEM images of typical intermediates with the inordinate overgrowth occurred both at the tips and the edges of the triangular nanoprism.

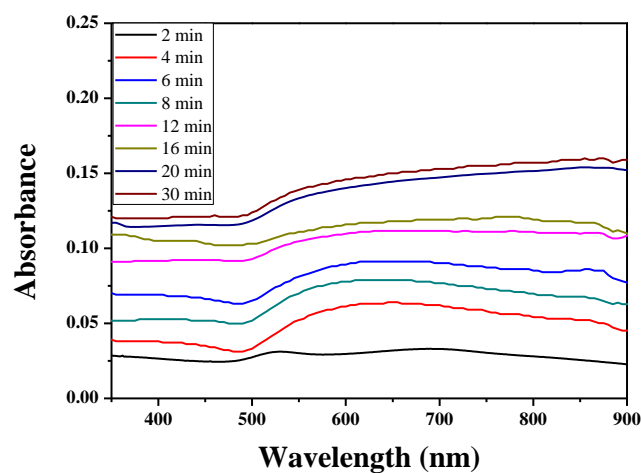

**Fig. S5** The typical UV-vis absorption spectra of the 2DHBNs recorded at different reaction times.

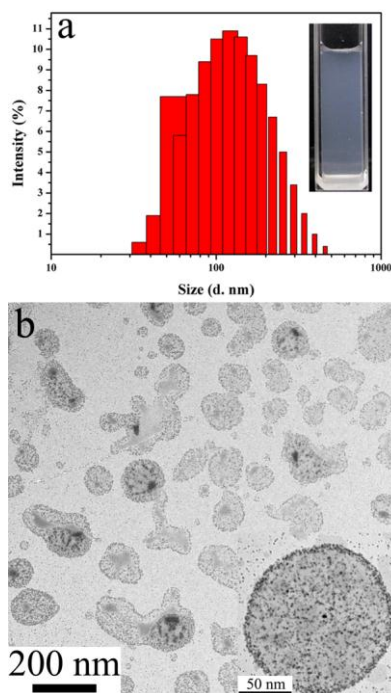

**Fig. S6** DLS data (a) and TEM image (b) of the vesicles formed in the solution containing 0.2 mM  $C_{12}C_6C_{12}Br_2$ . The vesicles constructed by  $C_{12}C_6C_{12}-(AuCl)_2$  complexes were easily reduced in-situ under the irradiation of TEM electron beam.

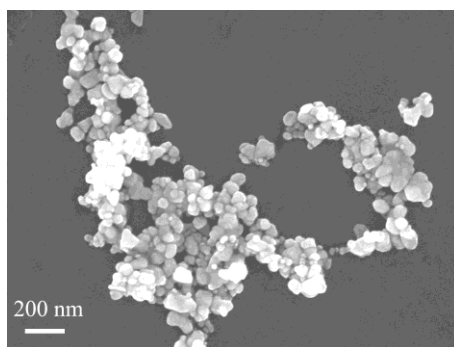

**Fig. S7** SEM image of the obtained gold product through reduction of 0.2 mM HAuCl<sub>4</sub> by 0.2 mM AA in the presence of 0.1 mM dodecyltrimethylammonium bromide (DTAB).

**The calculation of enhancement factor (EF)<sup>S1</sup>:**

The enhancement factor (EF) value was calculated using the equation (1):

$$EF = (I_{\text{SERS}}/N_{\text{ads}}) / (I_{\text{bulk}}/N_{\text{bulk}}) \quad (1)$$

$I_{\text{SERS}}$  and  $I_{\text{bulk}}$  are the vibration intensity in the SERS and normal Raman spectra, respectively.  $N_{\text{bulk}}$  and  $N_{\text{ads}}$  are the number of molecules of solid and number of molecules of adsorbed R6G on the SERS substrate in the laser spot volume, respectively.

$N_{\text{ads}}$  can be calculated according to the equation (2):

$$N_{\text{ads}} = N_{\text{d}}A_{\text{laser}}A_{\text{N}}/\sigma \quad (2)$$

where  $N_{\text{d}}$  is the number density of the Au 2DHBNs,  $A_{\text{laser}}$  is the area of the focal spot of laser,  $A_{\text{N}}$  is the 2DHBNs footprint area, and  $\sigma$  is the surface area occupied by an adsorbed R6G molecule, which is about 4 nm<sup>2</sup>.<sup>S2</sup> Due to the complex geometry, it is difficult to calculate the accurate surface area of the 2DHBNs. It could be regarded the 2DHBNs as a compact flat surface, then the total number of surface adsorbed molecules ( $N_{\text{ads}}$ ) within the illuminated laser spot was about  $1.96 \times 10^5$ .  $N_{\text{bulk}}$  is the molecule number of the solid R6G in the laser illumination volume. In our experiment, the laser spot diameter and penetration depth were  $\sim 1 \mu\text{m}$  and  $\sim 2 \mu\text{m}$ , respectively.  $N_{\text{bulk}}$  of R6G was calculated to

be  $2.49 \times 10^9$  using its density of  $1.26 \text{ g/cm}^3$ .

Finally, the EF values were estimated by considering the  $1510 \text{ cm}^{-1}$  Raman band using the equation (1). The calculated EF values were range from  $2.83 \times 10^5$  to  $1.46 \times 10^6$ , and the average value was  $6.29 \times 10^5$ .

## References

- S1. S. Guo, S. Dong and E. Wang, *Cryst. Growth Des.*, 2008, **9**, 372.  
S2. X. Bai, Y. Gao and L. Zheng, *CrystEngComm*, 2011, **13**, 3562.
